## COMPOSITION AND ASSEMBLY OF THE YEAST VACUOLAR H<sup>+</sup>-ATPase COMPLEX

LAURIE A. GRAHAM, BEN POWELL AND TOM H. STEVENS\*

*Institute of Molecular Biology, University of Oregon, Eugene, OR 97403-1229, USA*

\*Author for correspondence (e-mail: stevens@molbio.uoregon.edu)

*Accepted 21 October; published on WWW 13 December 1999*

### Summary

**The proton-translocating ATPase (H<sup>+</sup>-ATPase) found on the membrane of the yeast vacuole is the best characterized member of the V-type ATPase family. Biochemical and genetic screens have led to the identification of 14 genes, the majority designated VMA (for vacuolar membrane ATPase) encoding subunits of the enzyme complex. At least eight genes encode for proteins comprising the peripherally associated catalytic V<sub>1</sub> subcomplex, and six genes code for proteins forming the proton-translocating membrane V<sub>o</sub> subcomplex. Several additional genes have been identified that encode proteins that are not part of the final V-ATPase complex yet are required for its assembly. These non-subunit Vma proteins function as dedicated V-ATPase**

**assembly factors since their absence appears to inhibit assembly of the V-ATPase only. The assembly factors designated Vma12p, Vma21p and Vma22p have been localized to the membrane of the endoplasmic reticulum and aid the association of newly synthesized V-ATPase subunits translocated into the endoplasmic reticulum membrane. Two of these proteins, Vma12p and Vma22p, function together in an assembly complex that interacts directly with nascent V-ATPase subunits.**

Key words: V-ATPase, yeast, *Saccharomyces cerevisiae*, vacuole, multisubunit complex, proton-translocating, assembly.

### Introduction

The proton-translocating ATPase (H<sup>+</sup>-ATPase) found on the vacuolar membrane of the yeast *Saccharomyces cerevisiae* is one of the most extensively characterized members of the V-type ATPase family (V-ATPase). V-ATPases are multisubunit complexes present in all eukaryotic cells and are required for a range of cellular processes including receptor-mediated endocytosis, renal acidification, bone reabsorption, neurotransmitter accumulation and activation of acid hydrolases (Stevens and Forgac, 1997). In yeast, the V-ATPase functions to acidify the vacuole by driving the translocation of protons into the lumen of the vacuole. The hydrolysis of cytosolic ATP by the V-ATPase is required for the movement of protons from the cytosol into the interior of the vacuole. The proton gradient generated across the yeast vacuolar membrane by the V-ATPase in yeast is utilized by other membrane-bound transporters to drive the accumulation of ions and small molecules, amino acids and metabolites into the vacuole (Forgac, 1989; Jones et al., 1997). In yeast, a second V-type ATPase is also present in a nonvacuolar location, on the membranes of the Golgi and/or endosomes, serving to acidify these organelles of the secretory pathway (Manolson et al., 1994).

Like the F<sub>1</sub>F<sub>o</sub>-ATPase of mitochondria, the V-ATPase can be functionally divided into two structurally distinct domains; the catalytic V<sub>1</sub> subcomplex and the proton-translocating V<sub>o</sub> subcomplex. Subunits comprising the catalytic V<sub>1</sub> subcomplex of peripherally associated proteins are localized on the

cytosolic face of the vacuolar membrane. The V<sub>1</sub> subcomplex is assembled onto the V<sub>o</sub> subcomplex, which is composed of both peripheral and integral membrane proteins, resulting in the formation of a functional enzyme complex (Fig. 1). The biogenesis of the multisubunit V-ATPase requires the coordinated association of V<sub>1</sub> subunits synthesized in the cytosol with V<sub>o</sub> subunits that are targeted to the vacuolar membrane. We know that V-ATPase V<sub>o</sub> subunits are transported to the vacuole *via* the secretory pathway since mutations affecting the trafficking of the soluble vacuolar hydrolase carboxypeptidase Y, *via* the secretory pathway, also affect the targeting of V<sub>o</sub> subunits (Bryant et al., 1998).

Examination of various mutant yeast cells, lacking either a V<sub>1</sub> or V<sub>o</sub> subunit, has broadened our understanding of the association and assembly of the V-ATPase. Generally, the loss of a V<sub>1</sub> subunit of the catalytic domain has little effect on the stability of the remaining V<sub>1</sub> subunits, but does prevent their assembly onto the vacuolar membrane. In cells lacking a V<sub>1</sub> subunit (except for Vma7p), the V<sub>o</sub> subunits remain stable and assemble normally into a V<sub>o</sub> subcomplex that is targeted to the vacuolar membrane. Therefore, the ability to assemble V<sub>1</sub> subunits onto the V<sub>o</sub> subcomplex requires the presence of all the V<sub>1</sub> subunits (except the 54 kDa subunit; Ho et al., 1993b). In contrast, the loss of a V<sub>o</sub> subunit forming the V-ATPase membrane anchor affects the stability and assembly or localization of the remaining V<sub>o</sub> subunits. In these mutant yeast cells lacking a V<sub>o</sub> subcomplex, the V<sub>1</sub> subunits are stable but

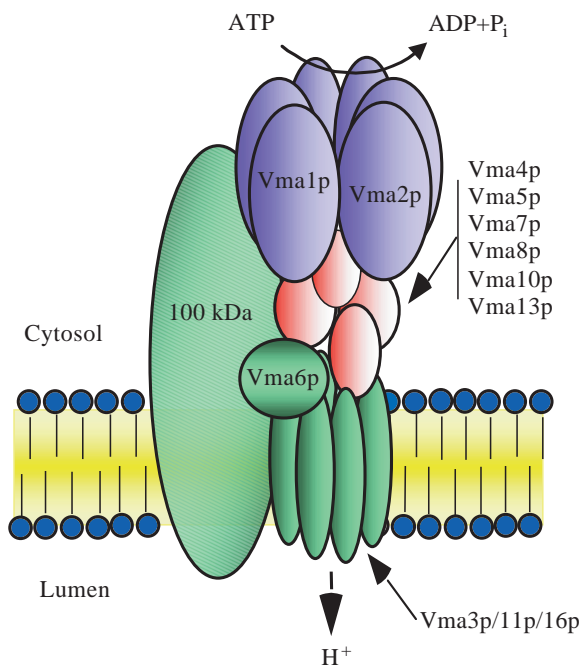

Fig. 1. Proposed composition of the yeast V-ATPase. The V-ATPase is composed of two large multisubunit subcomplexes designated  $V_1$  (blue and red) and  $V_0$  (green). The translocation of protons into the lumen of the vacuole by the  $V_0$  subcomplex is coupled to the hydrolysis of cytosolic ATP by the  $V_1$  subcomplex. The  $V_1$  subcomplex is composed of peripherally associated subunits of predicted molecular mass 69 kDa (Vma1p, A), 60 kDa (Vma2p, B), 54 kDa (Vma13p, H), 42 kDa (Vma5p, C), 32 kDa (Vma8p, D), 27 kDa (Vma4p, E), 14 kDa (Vma7p, F) and 13 kDa (Vma10p, G). The catalytic subunits are shaded blue and the stalk subunits bridging the association of the catalytic subunits to the membrane are shaded red. The  $V_0$  subcomplex (green) is composed of integral and peripheral subunits, of molecular mass 100 kDa (Vph1p or Stv1p, a) and 36 kDa (Vma6p, d), and three proteolipids, 23 kDa (Vma16p, c''), 17 kDa (Vma11p, c') and 16.5 kDa (Vma3p, c) forming the proton channel through the membrane.

present in the cytosol and are unable to assemble onto the vacuolar membrane.

### Identification of genes encoding V-ATPase subunits

Biochemical analysis of a detergent-solubilized and purified yeast V-ATPase complex initially suggested that only three subunits form the functional enzyme complex (Uchida et al., 1985). Upon further analysis, the number of subunits detected by polyacrylamide electrophoresis increased to at least ten, ranging in molecular mass from 14 kDa to 100 kDa (Graham et al., 1995; Kane et al., 1989). Biochemical and genetic analyses have allowed the identification of a large number of *VMA* (vacuolar membrane ATPase) genes encoding proteins required for the assembly of a functional enzyme complex. To date, at least 17 genes have been identified that encode proteins required for the assembly of the yeast V-ATPase complex (Table 1). Of these, 14 genes encoding *bona fide* subunits of

the yeast V-ATPase enzyme complex have been identified, cloned and characterized.

Yeast cells lacking V-ATPase activity due to disruption of a *VMA* gene exhibit a characteristic set of growth phenotypes. The cells lacking V-ATPase activity remain viable but demonstrate increased sensitivity to  $\text{Ca}^{2+}$  in the growth medium, an inability to grow in medium buffered to neutral pH and an inability to utilize nonfermentable sources of carbon (i.e. glycerol or ethanol). All these growth phenotypes have been successfully utilized in genetic screens aimed at identifying additional *VMA* genes (Ho et al., 1993a; Ohya et al., 1991). Genetic screens have provided the only means to identify *VMA* and other genes that code for proteins required for assembly or activity of the complex but do not function as *bona fide* V-ATPase subunits (Oluwatosin and Kane, 1997, 1998).

### Composition of the $V_1$ subcomplex

The yeast  $V_1$  subcomplex is composed of at least eight polypeptides of 69, 60, 54, 42, 32, 27, 16 and 14 kDa (Table 1).  $V_1$  subunits are peripherally associated with the vacuolar membrane and can be released from the membranes by treatment with reagents such as alkaline carbonate and urea (Graham et al., 1995). In addition,  $V_1$  subunits are released from vacuolar membranes in an ATP-dependent treatment with potassium nitrate (Graham et al., 1995). The release of  $V_1$  subunits by nitrate occurs only in the presence of ATP, presumably reflecting a conformational change of the  $V_1$  subcomplex due to the binding and/or hydrolysis of ATP. The ATP-induced conformational change appears to affect the physical interaction between  $V_1$  subunits and the membrane, making them susceptible to release from the  $V_0$  subcomplex upon treatment with chaotropic reagents (e.g.  $100 \text{ mmol l}^{-1} \text{ NO}_3^-$ ). The specific release of  $V_1$  subunits by this treatment directly reflects their role in forming the ATP-hydrolyzing portion of the complex.

Proteins homologous to all the yeast  $V_1$  subunits have been identified in a wide range of organisms from bacteria to higher eukaryotes including humans (Stevens and Forgac, 1997). Even though we are just beginning to understand the role of these subunits, the sequence and, presumably, the structure and function have been highly conserved throughout evolution. In addition, the number of subunits required to form the  $V_1$  subcomplex has also been conserved across a wide range of organisms.

Together, Vma1p (69 kDa subunit A; Hirata et al., 1990) and Vma2p (60 kDa subunit B; Nelson et al., 1989) form the catalytic and nucleotide-binding subunits homologous to the  $\beta$  and  $\alpha$  subunits of the  $F_1F_0$ -ATPase complex, respectively. In yeast, the protein sequence of Vma1p is 48% identical to that of Vma2p and 46–47% identical to those of the  $\alpha$  and  $\beta$  subunits of the  $F_1F_0$ -ATPase. Three copies of both Vma1p and Vma2p are present in each enzyme complex, assembling to form the catalytic ATP-hydrolyzing portion of the V-ATPase. The Vma1p is translated as a 119 kDa protein that is converted

Table 1. Yeast genes required for V-ATPase composition and assembly

| Gene                    | Subunit | Apparent molecular mass (kDa) | Integral or peripheral | Proposed function                                           |
|-------------------------|---------|-------------------------------|------------------------|-------------------------------------------------------------|
| <b>V<sub>1</sub></b>    |         |                               |                        |                                                             |
| <i>VMA1</i>             | A       | 69                            | Peripheral             | ATP-binding catalytic subunit                               |
| <i>VMA2</i>             | B       | 60                            | Peripheral             | ATP-binding subunit                                         |
| <i>VMA4</i>             | E       | 27                            | Peripheral             | Interacts with Vma10p                                       |
| <i>VMA5</i>             | C       | 42                            | Peripheral             |                                                             |
| <i>VMA7</i>             | F       | 14                            | Peripheral             | Interacts with Vma8p                                        |
| <i>VMA8</i>             | D       | 32                            | Peripheral             | Interacts with Vma7p                                        |
| <i>VMA10</i>            | G       | 16                            | Peripheral             | Required to stabilize Vma4p                                 |
| <i>VMA13</i>            | H       | 54                            | Peripheral             | Activation of V-ATPase                                      |
| <b>V<sub>o</sub></b>    |         |                               |                        |                                                             |
| <i>VPH1</i>             | a       | 100                           | Integral               | Vacuole-specific V <sub>o</sub> subunit                     |
| <i>VMA3</i>             | c       | 16.5                          | Integral               | Proton-translocating proteolipid<br>DCCD binding, four TMDs |
| <i>VMA6</i>             | d       | 36                            | Peripheral             | Hydrophilic V <sub>o</sub> subunit                          |
| <i>VMA11</i>            | c'      | 17                            | Integral               | Proteolipid similar to Vma3p                                |
| <i>VMA16</i>            | c''     | 23                            | Integral               | Proteolipid similar to Vma3p,<br>possibly five TMDs         |
| <b>Isoform</b>          |         |                               |                        |                                                             |
| <i>STV1</i>             |         | 100                           | Integral               | Similar to Vph1p,<br>non-vacuolar localization              |
| <b>Assembly factors</b> |         |                               |                        |                                                             |
| <i>VMA12</i>            |         | 25                            | Integral               | Required for assembly, not a subunit                        |
| <i>VMA21</i>            |         | 8.5                           | Integral               | Hydrophobic protein required for<br>assembly, not a subunit |
| <i>VMA22</i>            |         | 21                            | Peripheral             | Hydrophilic protein,<br>binds to membrane <i>via</i> Vma12p |

DCCD, *N,N'*-dicyclohexylcarbodiimide; TMD, transmembrane domain.

to a 69 kDa final product by the unique process of protein splicing involving the removal of a 50 kDa internal protein (Kane et al., 1990).

The function of the remaining V<sub>1</sub> subunits is unknown, but they may play a role in coupling the catalytic Vma1p and Vma2p subunits to the V<sub>o</sub> subcomplex, analogous to the stalk subunits of the F<sub>1</sub>F<sub>o</sub>-ATPase. Structural analysis has revealed strong similarities between the V<sub>1</sub>V<sub>o</sub>-ATPase and the F<sub>1</sub>F<sub>o</sub>-ATPase (Svergun et al., 1998). Unfortunately, comparison of the protein sequence of the remaining yeast V<sub>1</sub> subunits with the sequence of the F<sub>1</sub>F<sub>o</sub>-ATPase stalk subunits has revealed no obvious sequence homology. Thus, it is more likely that the V-ATPase V<sub>1</sub> subunits share structural homology, as opposed to protein sequence homology, with the F-ATPase stalk subunits.

The loss of any one of the stalk subunits prevents the assembly of either Vma1p or Vma2p onto the membranes of the vacuole, which is consistent with these proteins being essential components of the V<sub>1</sub> subcomplex. The 27 kDa (subunit E) and 42 kDa (subunit C) V<sub>1</sub> subunits are encoded by the *VMA4* (Foury, 1990) and *VMA5* genes, respectively (Ho et al., 1993a). The *VMA7* gene encodes a novel 14 kDa hydrophilic protein (subunit F), which displays characteristics of both a V<sub>1</sub> and V<sub>o</sub> subunit (Graham et al., 1994; Nelson et

al., 1994). In cells lacking Vma7p, the V<sub>1</sub> subunits are present at normal levels, but they are unable to associate with vacuolar membranes. Surprisingly, cells lacking Vma7p also show reduced levels of V<sub>o</sub> subunits (100 kDa protein and 17 kDa proteolipid) present on the vacuolar membrane (Graham et al., 1994). Vma7p is the only V-ATPase subunit characterized that affects both the V<sub>1</sub> and V<sub>o</sub> subcomplexes, suggesting its role as a *bona fide* stalk subunit bridging the two subcomplexes.

The *VMA8* gene codes for a prominent 32 kDa protein (subunit D) that was easily identified in Coomassie-stained SDS-PAGE gels of purified yeast V-ATPase complex (Graham et al., 1995; Kane et al., 1989; Nelson et al., 1995). Vma8p behaves as a classic V<sub>1</sub> peripheral subunit, being released from membranes by treatment with alkaline carbonate, urea and nitrate in the presence of ATP. The loss of Vma8p prevents the assembly of the other V<sub>1</sub> subunits onto the membrane. The results of Tomashek et al. (1997) suggest that Vma7p (subunit F) and Vma8p (subunit D) associate to form a stable complex that can be detected in the cytosol of *vma* mutant and wild-type cells. It is proposed that the Vma7p/Vma8p complex is able to associate with other V<sub>1</sub> subunits, eventually forming a V<sub>1</sub> subcomplex (Tomashek et al., 1997).

The *VMA10* gene encodes a hydrophilic protein of 13 kDa (subunit G) that migrates as a protein of slightly slower electrophoretic mobility (16 kDa), a behavior first observed in a Vma10p homologue identified in another organism, the tobacco hornworm *Manduca sexta* (Lepier et al., 1996; Supekova et al., 1995). The yeast Vma10p was originally characterized as a component of the  $V_o$  domain (Supekova et al., 1995), but recently we have demonstrated using several different criteria that Vma10p behaves as a model peripherally associated  $V_1$  subunit (Tomashek et al., 1997), as it does in insects (Lepier et al., 1996). Interestingly, it has been observed that the loss of Vma10p (subunit G) results in an increased rate of turnover of the Vma4p (subunit E), with little effect on the stability of the other  $V_1$  subunits (Tomashek et al., 1997). This observation, together with chemical cross-linking data, indicates that Vma10p and Vma4p form a subcomplex and probably interact directly with each other in the fully assembled V-ATPase (Tomashek et al., 1997).

*VMA13* codes for a 54 kDa hydrophilic protein (subunit H), an atypical peripheral  $V_1$  subunit that co-purifies with the V-ATPase complex (Ho et al., 1993b). Remarkably, cells lacking Vma13p are still able to assemble a V-ATPase on the vacuole, yet the assembled complex is inactive. In the absence of Vma13p, the assembled  $V_1$  subunits appear to be more loosely associated with the membranes and can be released simply by low-salt treatment (Ho et al., 1993b). These results suggest that Vma13p may function to regulate the activity of the assembling V-ATPase complex. Unlike other  $V_1$  subunits, Vma13p would be required only after the  $V_1$  subcomplex has assembled onto the  $V_o$  subcomplex. The role of Vma13p would then be to activate, and possibly inactivate, the V-ATPase enzyme complex.

#### Assembly of the $V_1$ subcomplex

The loss of any single  $V_1$  subunit prevents assembly of the remaining subunits onto the vacuolar membrane, yet they remain stable in the cytosol. Several partially assembled subcomplexes composed of  $V_1$  subunits have been observed in the cytosol of various yeast *vma* mutants (Doherty and Kane, 1993; Tomashek et al., 1997). In mutant cells unable to form a  $V_o$  membrane anchor complex, the  $V_1$  subunits are present in the cytosol as a large complex (approximately 550 kDa) containing at least Vma1p (subunit A), Vma2p (subunit B), Vma4p (subunit E), Vma10p (subunit G), Vma7p (subunit F) and Vma8p (subunit D; Tomashek et al., 1997). This suggests that the assembly of the  $V_1$  subcomplex requires the presence of all  $V_1$  subunits and that the  $V_1$  subcomplex is capable of complete assembly prior to association with the  $V_o$  subcomplex. Where and when the  $V_1$  subcomplex assembles with the  $V_o$  subcomplex in wild-type cells, forming a functional enzyme, is unknown.

#### Composition of the $V_o$ subcomplex

The yeast  $V_o$  subcomplex is composed of at least five

polypeptides of 100, 36, 23, 17 and 16.5 kDa (Table 1; Stevens and Forgac, 1997). All the  $V_o$  subunits are integral membrane proteins except for the 36 kDa protein, which is a peripheral membrane protein that is tightly associated with the  $V_o$  subcomplex (Bauerle et al., 1993). All the  $V_o$  subunits must be expressed in the cell in order to assemble a  $V_o$  subcomplex. Cells lacking any  $V_o$  subunit fail to provide a membrane anchor for the  $V_1$  subunits, thereby prohibiting membrane association of the V-ATPase subunits. In these  $V_o$  mutant cells, the peripheral  $V_1$  subunits, even though unable to associate with the vacuolar membrane, remain stable in the cytosol (Bauerle et al., 1993; Hirata et al., 1997). In  $V_1$  mutant cells, the  $V_o$  subcomplex does assemble, remains stable and is successfully transported to the vacuole as in wild-type cells (Graham et al., 1995).

The 100 kDa V-ATPase subunit of the  $V_o$  subcomplex (subunit a) is a polytopic membrane protein encoded by two genes in yeast, designated *VPH1* and *STV1* (Manolson et al., 1992, 1994). The Vph1p is a subunit of the V-ATPase complex found on the vacuolar membrane, and Stv1p is a subunit of a second V-ATPase complex found on the membranes of the Golgi and/or endosome. Neither of the genes encoding the 100 kDa proteins is designated as a *VMA* gene because loss of either Vph1p or Stv1p alone does not result in cells displaying a  $Vma^-$  growth phenotype. Loss of Vph1p results in cells possessing no detectable V-ATPase activity, yet these cells are still able to grow in media buffered to neutral pH (Manolson et al., 1992). Cells lacking Stv1p fail to display any  $Vma^-$  growth phenotype and grow like wild-type cells (Manolson et al., 1994). Only when yeast cells lack both Vph1p and Stv1p do they exhibit the full complement of  $Vma^-$  phenotypes (Manolson et al., 1994), suggesting that these proteins are functionally important. The proteins Vph1p and Stv1p are highly homologous (54% identical) and are isoforms serving as components of V-ATPase complexes present in different cellular locations. The two V-ATPase complexes identified in yeast differ only in whether they contain Vph1p or Stv1p as the 100 kDa subunit, since both are composed of the same  $V_1$  subunits and assemble with the same  $V_o$  subunits.

A comparison of the protein sequence of Vph1p and Stv1p reveals that both proteins are divided into a hydrophilic N-terminal half and a hydrophobic C terminus comprising several (6–9) membrane-spanning domains. Despite the similarity in sequence and in function, there is a difference between the Stv1p and Vph1p proteins resulting in the targeting of one to the vacuole and the other to an earlier compartment of the secretory pathway. It is likely that an as yet undetermined targeting sequence is responsible for the differential targeting of these two highly related proteins.

The 36 kDa hydrophilic  $V_o$  protein is encoded by the *VMA6* gene (Bauerle et al., 1993). The Vma6p (subunit d) is unusual because it is the only peripherally associated component of the membrane  $V_o$  subcomplex. Vma6p has been identified as a  $V_o$  subunit, and not a  $V_1$  peripheral subunit, since loss of Vma6p prohibits the remaining  $V_o$  subunits from reaching the vacuole because of their inability to assemble and form a  $V_o$

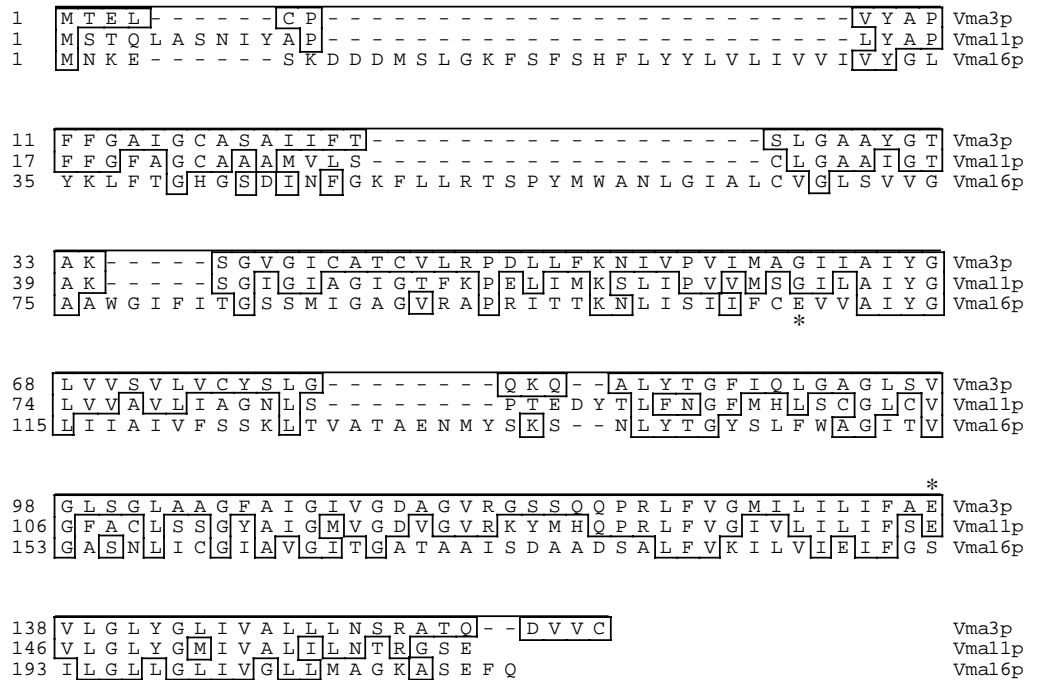

Fig. 2. Sequence comparison of yeast proteolipid V-ATPase subunits. Alignment of the amino acid sequence of subunits Vma3p, Vma11p and Vma16p generated using the MegAlign computer program. Boxed sequence indicate identities between Vma11p and/or and Vma3p. Asterisks mark the positions of key glutamic acid residues in Vma3p (Glu137), Vma11p (Glu145), and Vma16p (Glu108) that are required for proton translocation. Note the additional sequence at the N terminus of Vma16p that is predicted to form a fifth membrane-spanning domain.

subcomplex. Surprisingly, in cells lacking a V<sub>o</sub> subunit such as Vph1p, the Vma6p remains stable in the cell yet is not found associated with membranes; instead, it is found in the cytosol. Specifically which V<sub>o</sub> subunit serves to anchor the Vma6p to the membranes remains to be determined and is a subject of future study.

Unlike the membrane-spanning, proton-translocating channel of the F-ATPase that is formed by oligomers of the c subunit, the proton pore of the V-ATPase is formed by the assembly of at least three proteins of 16.5, 17 and 23 kDa. These proteins are encoded by the *VMA3*, *VMA11* and *VMA16* genes, respectively (Hirata et al., 1997). Vma3p (subunit c), Vma11p (subunit c') and Vma16p (subunit c'') are referred to as proteolipids because they can be isolated from vacuolar membranes by extraction into organic solvent (Noumi et al., 1991). Like the 100 kDa proteins, the proteolipids are inserted into the membranes of the endoplasmic reticulum following synthesis, where they assemble with V<sub>o</sub> subunits and are targeted to the membrane of the vacuole *via* the secretory pathway.

The hydrophobic 16.5 kDa protein (Vma3p) is predicted to form four membrane-spanning domains with both the N and C termini exposed to the lumen of the vacuole (Nelson and Nelson, 1989; Umemoto et al., 1990). Comparison of the amino acid sequence of the three proteolipids, Vma3p, Vma11p and Vma16p, reveals a high degree of sequence identity and presumably similar predicted membrane topography (Fig. 2). The 17 kDa proteolipid (Vma11p) is 56 % identical to the amino acid sequence of Vma3p and is also predicted to possess four membrane-spanning domains (Hirata et al., 1997; Umemoto et al., 1991). The 23 kDa proteolipid (Vma16p) is slightly larger than the other two proteins and is only 35 % identical to Vma3p (Apperson et al., 1990; Hirata

et al., 1997). Unlike Vma3p and Vma11p, Vma16p is predicted to form five membrane-spanning domains.

Cells lacking Vma3p, Vma11p or Vma16p display identical phenotypes. Loss of any one of the proteolipids results in failure to assemble the V<sub>o</sub> subcomplex and an increased rate of degradation of the 100 kDa protein Vph1p (Hirata et al., 1997). In addition, the loss of any one proteolipid prevents Vma6p from associating with the membrane V<sub>o</sub> domain. The V<sub>1</sub> subunits are present at wild-type levels, but are not assembled onto the vacuolar membranes in cells lacking Vma3p, Vma11p or Vma16p. The fate of the remaining proteolipids in cells lacking any one of the proteolipid subunits has yet to be determined. We have observed that cells lacking Vma16p still contain a proteolipid of approximately 17 kDa, although in reduced amounts and not associated with vacuolar membranes (Hirata et al., 1997). It is possible that failure to assemble all three proteolipid subunits together prevents them from exiting the endoplasmic reticulum and being targeted to the vacuole.

Even though the proteolipids share a high degree of identity, they are not functionally redundant, since all three are required to assemble a functional V-ATPase. The over-expression of Vma3p in cells lacking Vma11p, or the over-expression of Vma11p in cells lacking Vma3p, does not restore the *vma*<sup>-</sup> phenotype of these mutant cells to wild-type (Umemoto et al., 1991). The actual stoichiometry of Vma3p, Vma11p and Vma16p in the V<sub>o</sub> complex remains to be determined. Direct comparison of the level of the three proteins present on vacuolar membranes by immunoblot analysis shows that Vma3p is more abundant than either Vma11p or Vma16p (Hirata et al., 1997). The presence of Vma11p and Vma16p within each V<sub>o</sub> complex could account for the inability of the remaining proteolipids to form cross-linked species larger than

dimeric complexes (Powell, 1999). The molecular dissection of these related proteolipids to determine their stoichiometry, structure and function within the V-ATPase complex is the aim of future experiments.

Each of the proteolipids contains a glutamic acid residue (Vma3p Glu137, Vma11p Glu145, and Vma16p Glu108) that is required for proton-translocating activity (Hirata et al., 1997). In both Vma3p and Vma11p, the key glutamic acid residue is found in the fourth transmembrane domain, but in Vma16p it is in the third from last predicted transmembrane domain (Hirata et al., 1997). The glutamic acid residue of Vma3p serves as the binding site for the lipophilic compound *N, N'*-dicyclohexylcarbodiimide (DCCD). DCCD is a known inhibitor of both F-type and V-type ATPases through covalent modification of highly conserved acidic residues within Vma3p and subunit c (of  $F_0$ ), thus preventing ATP-coupled proton translocation. The reaction of these conserved acidic residues in both F- and V-type ATPases with DCCD suggests that they are directly accessible to the lipid phase of the bilayer. Mutation of these key glutamic acid residues in Vma3p and subunit c prevents modification by DCCD. It has also been shown that mutation of the conserved glutamic acid residues within Vma11p and Vma16p to glutamine inactivates the V-ATPase enzyme complex, even though it appears to be fully assembled (Hirata et al., 1997). However, it is currently unknown whether both Vma11p and Vma16p are also modified by the lipophilic probe DCCD.

The inactivating mutations in Vma11p (Glu145) and Vma16p (Glu108) resulted in a higher percentage of assembled V-ATPase complexes present on the vacuolar membrane compared with membranes from wild-type cells (Hirata et al., 1997). Fractionation of detergent-solubilized vacuolar membranes results in the separation of a  $V_0$  subfraction away from the  $V_1V_0$  fully assembled V-ATPase complex. The unassembled V-ATPase complex represented by the  $V_0$  subfraction may be due to either physical removal of the  $V_1$  subcomplex during purification or may represent a mechanism to regulate V-ATPase activity (Kane, 1995). The inability of these mutants to carry out proton translocation coupled to ATP hydrolysis directly affects the assembly and/or retention of  $V_1$  subunits onto the vacuolar membranes.

#### Assembly of the $V_0$ subcomplex

Newly synthesized 100kDa and proteolipid proteins are inserted into the membranes of the endoplasmic reticulum, where they assemble together with Vma6p and are then targeted to the vacuole or Golgi/endosome by the secretory pathway. Failure to assemble the  $V_0$  subcomplex, because of loss of the proteolipid Vma3p or Vma6p, results in decreased cellular levels of the 100kDa V-ATPase subunit, with little being found on the vacuolar membrane (Bauerle et al., 1993; Hirata et al., 1997). In cells lacking any one of these  $V_0$  subunits, the 100kDa polypeptides are less stable, resulting in a decreased half-life of approximately 30 min compared with a half-life in wild-type cells in excess of 400 min (Graham et

al., 1998). The stability of the 100kDa V-ATPase subunit is increased by the ability to assemble properly into the newly forming  $V_0$  subcomplex. The increased turnover rate of the 100kDa V-ATPase subunit in the absence of  $V_0$  assembly is not dependent on vacuolar proteases, suggesting that degradation occurs at another cellular location, such as the endoplasmic reticulum (Hill and Stevens, 1995). The degradation of the 100kDa V-ATPase subunit in cells lacking a  $V_0$  subunit may serve to prevent transport of unassembled  $V_0$  subunits to the vacuolar membrane.

The lack of a  $V_0$  subunit, such as Vma6p, affects the localization of the proteolipid subunits since they are now prevented from reaching the vacuolar membrane (Bauerle et al., 1993). It has not been determined whether the stability, in addition to the localization, of all the proteolipids is affected by the loss of Vma6p, but we have observed no significant destabilization of the Vma3p in these mutant cells (L. Graham, unpublished results). Additional experiments are needed to determine how the assembly of these three proteolipids is coordinated, especially since they are present in different ratios within individual V-ATPase complexes.

Recall that, unlike the 100kDa protein Vph1p, the protein Vma6p is not destabilized in cells lacking a  $V_0$  subunit, but is unable to associate with membranes (Bauerle et al., 1993). The Vma6p must assemble with the  $V_0$  subcomplex, from the cytosol, before the complex is competent to exit the endoplasmic reticulum for the vacuole. Once assembled, the Vma6p remains associated with the  $V_0$  subcomplex since it is found on vacuolar membranes even in cells unable to assemble a complete  $V_1$  subcomplex. We have yet to identify which protein mediates the peripheral association of Vma6p with membranes. Whether it occurs *via* the 100kDa protein or the proteolipids is the basis for future study. In our model for  $V_0$  assembly, all the  $V_0$  subunits must be present and assemble correctly in the endoplasmic reticulum prior to transport to the vacuole.

#### V-ATPase assembly factors

Three genes (*VMA12*, *VMA21* and *VMA22*) that have been identified through genetic analysis of *vma* mutants encode proteins required to assemble a functional V-ATPase, yet are not subunits of the enzyme complex. *VMA12* encodes a 25kDa integral membrane protein predicted by hydropathy analysis to contain two membrane-spanning helices (Hirata et al., 1993; Ohya et al., 1991). Cells lacking Vma12p display the full complement of  $Vma^-$  phenotypes including sensitivity to high levels of  $Ca^{2+}$ , loss of V-ATPase activity and failure to grow on media buffered to pH 7.5. Biochemical analysis of cells lacking the Vma12p revealed that all the  $V_1$  subunits were present but localized to the cytosol and thus not associated with the vacuolar membrane (Hirata et al., 1993). The  $V_0$  subunits were present in greatly reduced amounts in these mutant cells and also were not localized to vacuolar membranes, an effect similar to the loss of a  $V_0$  subunit. Surprisingly, Vma12p did not fractionate with the V-ATPase purified from vacuolar membranes, indicating that it is not a component of the final

enzyme complex. Yet, cells lacking Vma12p were unable to assemble a  $V_o$  subcomplex. Therefore, Vma12p is required for assembly of a functional V-ATPase, but is not a subunit of the enzyme complex. Cellular localization of the Vma12p to the membranes of the endoplasmic reticulum and not the vacuole suggested a role in the early assembly of the V-ATPase, specifically the  $V_o$  subunits, in the endoplasmic reticulum (Jackson and Stevens, 1997).

*VMA21* and *VMA22* were identified, in a separate genetic screen, as genes whose products are also required for V-ATPase assembly (Ho et al., 1993a). Characterization of *VMA21* demonstrated that it codes for small 8.5 kDa hydrophobic protein predicted to form two membrane-spanning domains (Hill and Stevens, 1994). Cellular localization of Vma21p by immunofluorescence revealed that this protein also resides in the endoplasmic reticulum membranes, like Vma12p. Retention of this protein in the endoplasmic reticulum is dependent on a di-lysine motif at the C terminus of Vma21p since modification of this motif results in localization of the protein to the vacuolar membrane (Hill and Stevens, 1994). Cells lacking Vma21p are unable to assemble a  $V_o$  subcomplex, thus resulting in the destabilization of the 100 kDa V-ATPase subunit. A small hydrophobic protein has been identified in both the *Manduca sexta* (M9.7; Merzendorfer et al., 1999) and bovine (M9.2; Ludwig et al., 1998) chromaffin granules that displays some similarity to Vma21p. Unlike Vma21p, both M9.7 and M9.2 proteins have been proposed to be subunits of the final V-ATPase enzyme complex; however, these proteins may be present in the V-ATPase at substoichiometric levels (Ludwig et al., 1998).

*VMA22* encodes a 21 kDa hydrophilic protein that is also required for the assembly of the V-ATPase (Hill and Stevens, 1995). Cells lacking Vma22p were phenotypically identical to cells lacking either Vma12p or Vma21p. Vma22p has also been localized to the membranes of the endoplasmic reticulum and not the vacuolar membrane. Subcellular fractionation analysis indicated that the membrane association of Vma22p is dependent on Vma12p, since in cells lacking Vma12p the Vma22p is found in the cytosol and not on the membrane (Hill and Stevens, 1995). A direct physical interaction between Vma12p and Vma22p was confirmed through the use of chemical crosslinking reagents under conditions that would form covalent crosslinks only between closely associated proteins (Graham et al., 1998). Even after detergent solubilization of cellular membranes with 1% Triton X-100, Vma12p and Vma22p remain strongly associated in a complex in the absence of crosslinking reagents. Therefore, Vma12p and Vma22p appear to function together and form a stable V-ATPase assembly complex. Under similar conditions, Vma21p was not observed to be part of the Vma12p/Vma22p complex and may function separately in aiding the assembly of the V-ATPase.

#### Assembly of the V-ATPase

What role do the Vma21p and the Vma12p/Vma22p complex play in the assembly of the V-ATPase? One focus of

our efforts has been towards identifying which of the V-ATPase subunits interact with the assembly factors. Additional crosslinking analysis revealed a direct interaction between newly synthesized 100 kDa subunit and the Vma12p/Vma22p assembly complex (Graham et al., 1998). Previous studies had shown that the 100 kDa V-ATPase subunit was inserted normally into membranes in the absence of Vma12p, thus ruling out a possible role for the Vma12p/Vma22p complex in aiding the translocation and/or folding of 100 kDa subunit in the endoplasmic reticulum membrane (Jackson and Stevens, 1997). This result suggests that the Vma12p/Vma22p complex must function at a later step aiding the assembly of the fully translocated and completely folded V-ATPase subunit into the  $V_o$  subcomplex.

Consistent with a transient interaction in the endoplasmic reticulum between the Vma12p/Vma22p assembly complex and newly synthesized 100 kDa V-ATPase subunit, kinetic analysis revealed that the interaction displayed a half-life of less than 5 min (Graham et al., 1998). The brief interaction between the Vma12p/Vma22p assembly complex and the 100 kDa V-ATPase subunit suggested that it occurs only while the newly synthesized  $V_o$  subunits are assembling in the endoplasmic reticulum. If the transport of newly synthesized proteins from the endoplasmic reticulum is blocked, by the use of a temperature-sensitive *sec* mutation, we observed a stabilization of the interaction between the Vma12p/Vma22p assembly complex and 100 kDa V-ATPase subunit (Graham et al., 1998). This stabilization suggests that continuous protein exit from the endoplasmic reticulum, specifically the packaging of the  $V_o$  subcomplex into endoplasmic-reticulum-derived vesicles, is required to disrupt the interaction between the Vma12p/Vma22p assembly complex and the  $V_o$  subunits.

We observed that the loss of Vma21p did not affect the formation of the Vma12p/Vma22p assembly complex or prevent the interaction between the assembly complex and the 100 kDa V-ATPase subunit (Graham et al., 1998). Results gathered to date suggest that Vma21p is not part of the Vma12p/Vma22p assembly complex. The hydrophobic nature of Vma21p, like that of the proteolipids, suggests that it may play a role in the assembly of the proteolipids in the  $V_o$  subcomplex. Preliminary results have revealed an interaction between Vma21p and newly synthesized proteolipids (L. Graham, P. Malkus, R. Schekman and T. Stevens, unpublished results). One role of Vma21p may be to aid in determining the correct stoichiometry of the proteolipids as they assemble into the  $V_o$  subcomplex.

Our proposed model describing V-ATPase assembly as it occurs in the endoplasmic reticulum is shown in Fig. 3. Two of the endoplasmic-reticulum-localized assembly factors, Vma12p and Vma22p, associate and appear to work together in assisting the assembly of V-ATPase subunits. Fully translocated and folded 100 kDa V-ATPase subunit interacts directly with the Vma12p/Vma22p assembly complex, possibly protecting the 100 kDa protein from degradation prior to its assembly into the  $V_o$  complex. The ability of the 100 kDa subunit to assemble into the  $V_o$  subcomplex extends its half-

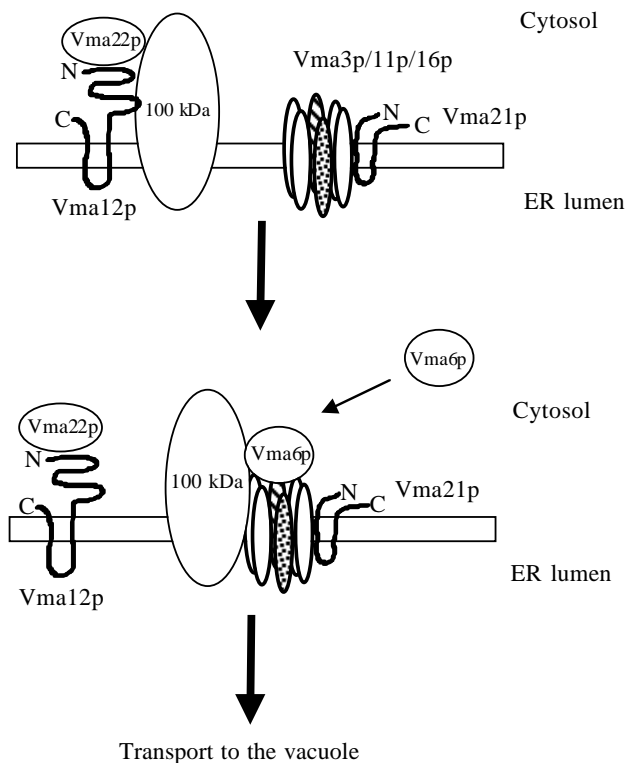

Fig. 3. Model of  $V_0$  assembly in the endoplasmic reticulum (ER). Subunits Vma12p and Vma22p interact to form a stable assembly complex in the membrane of the ER. The Vma12p/Vma22p assembly complex interacts directly but transiently with the 100 kDa protein Vph1p after it has been translated, translocated and folded correctly. The 100 kDa V-ATPase subunit would then assemble with the other  $V_0$  subunits in order for the V-ATPase to exit the ER for the vacuolar membrane. Vma21p would aid the assembly of the proteolipids (Vma3p, open; Vma11p, stippled; Vma16p, hatched) and possibly Vma6p either in parallel or downstream of the 100 kDa/Vma12p/Vma22p subcomplex. Assembly of all the  $V_0$  subunits may be followed by the dissociation of the Vma12p/Vma22p assembly factors from the  $V_0$  subcomplex prior to transport out of the ER. Vma21p may continue to interact with the  $V_0$  subcomplex following release from the Vma12p/Vma22p assembly complex and may even exit the ER with the  $V_0$  subcomplex, dissociating from the  $V_0$  subcomplex in the Golgi, followed by retrieval back to the ER.

life compared with an unassembled protein. The interaction between the 100 kDa V-ATPase subunit and the Vma12p/Vma22p assembly complex occurs even in the absence of Vma21p, and thus Vma12p/Vma22p association is independent of this third assembly factor (Graham et al., 1998).

We envisage the role of Vma21p to be one of aiding the assembly of the V-ATPase in parallel to the Vph1p/Vma12p/Vma22p interaction and involving the assembly of the proteolipids and possibly Vma6p into the  $V_0$  subcomplex. Vma21p, being a small hydrophobic protein itself, could serve as scaffolding for the assembly of the hydrophobic proteolipids, Vma3p, Vma11p and Vma16p into a proton channel. Vma21p may serve an additional role in V-

ATPase biosynthesis as shown by its di-lysine endoplasmic reticulum retention/retrieval motif. Vma21p could associate with the assembled  $V_0$  subcomplex (or the fully assembled  $V_1V_0$  complex) in the endoplasmic reticulum and escort the enzyme complex in vesicles bound for the Golgi complex (Herrmann et al., 1999). Vma21p would then dissociate from the V-ATPase early in the Golgi and be retrieved back to the endoplasmic reticulum for another cycle of assembly and transport. Vma21p may function, in addition to assembly, to load the V-ATPase complex into vesicles budding from the endoplasmic reticulum and, thus, serve as a specific 'cargo receptor' (Kuehn and Schekman, 1997). Future experiments will attempt to determine whether Vma21p is transported out of the endoplasmic reticulum with the  $V_0$  subcomplex as it is transported to the vacuole.

### Future perspectives

Current investigations are now focused on determining the precise roles of the 100 kDa V-ATPase subunit and of each of the three proteolipids within the enzyme complex. We hope to determine how these polypeptides interact, their stoichiometry and their involvement in ATP-coupled proton translocation. Experiments will be designed to obtain more detailed structural information regarding specific proteolipid-proteolipid interactions. A similar approach will also be used to investigate protein-protein interactions between other  $V_0$  subunits such as Vma6p and the proteolipids. A site-directed mutagenesis approach coupled with electron microscopy studies investigating the organization of the intact  $V_0$  domain will provide a detailed understanding of the composition, arrangement and organization of the  $V_0$  domain of the yeast V-ATPase. We will continue to define the role of the assembly factors and specifically describe which  $V_0$  subunits interact directly with Vma21p.

We thank Kate Bowers for critical reading of the manuscript. This work was supported by a grant from the National Institutes of Health (GM38006) to T.H.S.

### References

- Apperson, M., Jensen, R. E., Suda, K., Witte, C. and Yaffe, M. P. (1990). A yeast protein, homologous to the proteolipid of the chromaffin granule proton-ATPase, is important for cell growth. *Biochem. Biophys. Res. Commun.* **168**, 574–579.
- Bauerle, C., Ho, M. N., Lindorfer, M. A. and Stevens, T. H. (1993). The *Saccharomyces cerevisiae* VMA6 gene encodes the 36-kDa subunit of the vacuolar  $H^+$ -ATPase membrane sector. *J. Biol. Chem.* **268**, 12749–12757.
- Bryant, N. J., Piper, R. C., Gerrard, S. R. and Stevens, T. H. (1998). Traffic into the prevacuolar/endosomal compartment of *Saccharomyces cerevisiae*: A VPS45-dependent intracellular route and a VPS45-independent, endocytic route. *Eur. J. Cell Biol.* **76**, 43–52.
- Doherty, R. D. and Kane, P. M. (1993). Partial assembly of the yeast vacuolar  $H^+$ -ATPase in mutants lacking one subunit of the enzyme. *J. Biol. Chem.* **268**, 16845–16851.



- Forgac, M.** (1989). Structure and function of vacuolar class of ATP-driven proton pumps. *Physiol. Rev.* **69**, 765–796.
- Foury, F.** (1990). The 31-kDa polypeptide is an essential subunit of the vacuolar ATPase in *Saccharomyces cerevisiae*. *J. Biol. Chem.* **265**, 18554–18560.
- Graham, L. A., Hill, K. H. and Stevens, T. H.** (1994). VMA7 encodes a novel 14-kDa subunit of the *Saccharomyces cerevisiae* vacuolar H<sup>+</sup>-ATPase complex. *J. Biol. Chem.* **269**, 25974–25977.
- Graham, L. A., Hill, K. J. and Stevens, T. H.** (1995). VMA8 encodes a 32-kDa V<sub>1</sub> subunit of the *Saccharomyces cerevisiae* vacuolar H<sup>+</sup>-ATPase required for the function and assembly of the enzyme complex. *J. Biol. Chem.* **270**, 15037–15044.
- Graham, L. A., Hill, K. J. and Stevens, T. H.** (1998). Assembly of the yeast vacuolar H<sup>+</sup>-ATPase occurs in the endoplasmic reticulum and requires a Vma12p/Vma22p assembly complex. *J. Cell Biol.* **142**, 39–49.
- Herrmann, J. M., Malkus, P. and Schekman, R.** (1999). Out of the ER – outfitters, escorts and guides. *Trends Cell Biol.* **9**, 5–7.
- Hill, K. J. and Stevens, T. H.** (1994). Vma21p is a yeast membrane protein retained in the endoplasmic reticulum by a di-lysine motif and is required for the assembly of the vacuolar H<sup>+</sup>-ATPase complex. *Mol. Biol. Cell* **5**, 1039–1050.
- Hill, K. J. and Stevens, T. H.** (1995). Vma22p is a novel endoplasmic reticulum associated protein required for assembly of the yeast vacuolar H<sup>+</sup>-ATPase complex. *J. Biol. Chem.* **270**, 22329–22336.
- Hirata, R., Graham, L. A., Takatsuki, A., Stevens, T. H. and Anraku, Y.** (1997). VMA11 and VMA16 encode second and third proteolipid subunits of the *Saccharomyces cerevisiae* vacuolar membrane H<sup>+</sup>-ATPase. *J. Biol. Chem.* **272**, 4795–4803.
- Hirata, R., Ohsumk, Y., Nakano, A., Kawasaki, H., Suzuki, K. and Anraku, Y.** (1990). Molecular structure of a gene, VMA1, encoding the catalytic subunit of H<sup>+</sup>-translocating adenosine triphosphatase from vacuolar membranes of *Saccharomyces cerevisiae*. *J. Biol. Chem.* **265**, 6726–6733.
- Hirata, R., Umemoto, N., Ho, M. N., Ohya, Y., Stevens, T. H. and Anraku, Y.** (1993). VMA12 is essential for assembly of the vacuolar H<sup>+</sup>-ATPase subunits onto the vacuolar membrane in *Saccharomyces cerevisiae*. *J. Biol. Chem.* **268**, 961–967.
- Ho, M. N., Hill, K. J., Lindorfer, M. A. and Stevens, T. H.** (1993a). Isolation of vacuolar membrane H<sup>+</sup>-ATPase-deficient yeast mutants; the VMA5 and VMA4 genes are essential for assembly and activity of the vacuolar H<sup>+</sup>-ATPase. *J. Biol. Chem.* **268**, 221–227.
- Ho, M. N., Hirata, R., Umemoto, N., Ohya, Y., Takatsuki, A., Stevens, T. H. and Anraku, Y.** (1993b). VMA13 encodes a 54-kDa vacuolar H<sup>+</sup>-ATPase subunit required for the activity but not the assembly of the enzyme complex in *Saccharomyces cerevisiae*. *J. Biol. Chem.* **268**, 18286–18292.
- Jackson, D. D. and Stevens, T. H.** (1997). VMA12 encodes a yeast endoplasmic reticulum protein required for vacuolar H<sup>+</sup>-ATPase assembly. *J. Biol. Chem.* **272**, 25928–25934.
- Jones, E. W., Webb, G. C. and Hiller, M. A.** (1997). Biogenesis and function of the yeast vacuole. In *Molecular Biology of the Yeast Saccharomyces cerevisiae*, vol. III (ed. J. R. Pringle, J. R. Broach and E. W. Jones), pp. 363–469. Cold Spring Harbor: Cold Spring Harbor Laboratory Press.
- Kane, P. M.** (1995). Disassembly and reassembly of the yeast vacuolar H<sup>+</sup>-ATPase *in vivo*. *J. Biol. Chem.* **270**, 17025–17032.
- Kane, P. M., Yamashiro, C. T. and Stevens, T. H.** (1989). Biochemical characterization of the yeast vacuolar H(+)-ATPase. *J. Biol. Chem.* **264**, 19236–19244.
- Kane, P. M., Yamashiro, C. T., Wolczyk, D. F., Neff, N., Goebel, M. and Stevens, T. H.** (1990). Protein splicing converts the yeast *TFP1* gene product to the 69-kDa subunit of the vacuolar H<sup>+</sup>-adenosine triphosphatase. *Science* **250**, 651–657.
- Kuehn, M. J. and Schekman, R.** (1997). COPII and secretory cargo capture into transport vesicles. *Curr. Opin. Cell Biol.* **9**, 477–483.
- Lepier, A., Graf, R., Azuma, M., Merzendorfer, H., Harvey, W. R. and Wieczorek, H.** (1996). The peripheral complex of the tobacco hornworm V-ATPase contains a novel 13-kDa subunit G. *J. Biol. Chem.* **271**, 8502–8508.
- Ludwig, J., Kerscher, S., Brandt, U., Pfeiffer, K., Getlawi, F., Apps, D. K. and Schagger, H.** (1998). Identification and characterization of a novel 9.2-kDa membrane sector-associated protein of vacuolar proton-ATPase from chromaffin granules. *J. Biol. Chem.* **273**, 10939–10947.
- Manolson, M. F., Proteau, D., Preston, R. A., Stenbit, A., Roberts, B. T., Hoyt, M. A., Preuss, D., Mulholland, J., Botstein, D. and Jones, E. W.** (1992). The *VPH1* gene encodes a 95-kDa integral membrane polypeptide required for *in vivo* assembly and activity of the yeast vacuolar H(+)-ATPase. *J. Biol. Chem.* **267**, 14294–14303.
- Manolson, M. F., Wu, B., Proteau, D., Tailon, B. E., Roberts, B. T., Hoyt, M. A. and Jones, E. W.** (1994). *STV1* gene encodes functional homologue of the 95-kDa yeast vacuolar H<sup>+</sup>-ATPase subunit Vph1p. *J. Biol. Chem.* **269**, 14064–14074.
- Merzendorfer, H., Huss, M., Schmid, R., Harvey, W. R. and Wieczorek, H.** (1999). A novel insect V-ATPase subunit M9.7 is glycosylated extensively. *J. Biol. Chem.* **274**, 17372–17378.
- Nelson, H., Mandiyan, S. and Nelson, N.** (1989). A conserved gene encoding the 57-kDa subunit of the yeast vacuolar H<sup>+</sup>-ATPase [published erratum *J. Biol. Chem.* (1989) **264**, 5313]. *J. Biol. Chem.* **264**, 1775–1778.
- Nelson, H., Mandiyan, S. and Nelson, N.** (1994). The *Saccharomyces cerevisiae* VMA7 gene encodes a 14-kDa subunit of the vacuolar H<sup>+</sup>-ATPase catalytic sector. *J. Biol. Chem.* **269**, 24150–24155.
- Nelson, H., Mandiyan, S. and Nelson, N.** (1995). A bovine cDNA and a yeast gene (*VMA8*) encoding the subunit D of the vacuolar H<sup>+</sup>-ATPase. *Proc. Natl. Acad. Sci. USA* **92**, 497–501.
- Nelson, H. and Nelson, N.** (1989). The progenitor of ATP synthases was closely related to the current vacuolar H<sup>+</sup>-ATPase. *FEBS Lett.* **247**, 147–153.
- Noumi, T., Beltran, C., Nelson, H. and Nelson, N.** (1991). Mutational analysis of yeast vacuolar H<sup>+</sup>-ATPase. *Proc. Natl. Acad. Sci. USA* **88**, 1938–1942.
- Ohya, Y., Umemoto, N., Tanida, I., Ohta, A., Iida, H. and Anraku, Y.** (1991). Calcium-sensitive *cls* mutants of *Saccharomyces cerevisiae* showing a *pet-* phenotype are ascribable to defects of vacuolar membrane H<sup>+</sup>-ATPase activity. *J. Biol. Chem.* **266**, 13971–13977.
- Oluwatosin, Y. E. and Kane, P. M.** (1997). Mutations in the *CYS4* gene provide evidence for regulation of the yeast vacuolar H<sup>+</sup>-ATPase by oxidation and reduction *in vivo*. *J. Biol. Chem.* **272**, 28149–28157.
- Oluwatosin, Y. E. and Kane, P. M.** (1998). Mutations in the yeast *KEX2* gene cause a Vma<sup>-</sup>-like phenotype: a possible role for the Kex2 endoprotease in vacuolar acidification. *Mol. Cell. Biol.* **18**, 1534–1543.
- Powell, B.** (1999). Molecular architecture and functional analysis of a related class of H<sup>+</sup>-translocating 17 kDa proteolipids. PhD thesis, University of Leeds, UK.

- Stevens, T. H. and Forgac, M.** (1997). Structure, function and regulation of the vacuolar (H<sup>+</sup>)-ATPase. *Annu. Rev. Cell Dev. Biol.* **13**, 779–808.
- Supekova, L., Supek, F. and Nelson, N.** (1995). The *Saccharomyces cerevisiae* *VMA10* is an intron-containing gene encoding a novel 13-kDa subunit of vacuolar H<sup>+</sup>-ATPase. *J. Biol. Chem.* **270**, 13726–13732.
- Svergun, D. I., Konrad, S., Huss, M., Koch, M. H. J., Wiczorek, H., Altendorf, K., Volkov, V. V. and Gruber, G.** (1998). Quaternary structure of V<sub>1</sub> and F<sub>1</sub> ATPase: significance of structural homologies and diversities. *Biochemistry* **37**, 17659–17663.
- Tomashuk, J. J., Graham, L. A., Hutchins, M. U., Stevens, T. H. and Klionsky, D. J.** (1997). V<sub>1</sub>-situated stalk subunits of the yeast vacuolar proton-translocating ATPase. *J. Biol. Chem.* **272**, 26787–26793.
- Uchida, E., Ohsumi, Y. and Anraku, Y.** (1985). Purification and properties of H<sup>+</sup>-translocating, Mg<sup>2+</sup>-adenosine triphosphatase from vacuolar membranes of *Saccharomyces cerevisiae*. *J. Biol. Chem.* **260**, 1090–1095.
- Umemoto, N., Ohya, Y. and Anraku, Y.** (1991). *VMA11*, a novel gene that encodes a putative proteolipid, is indispensable for expression of yeast vacuolar membrane H<sup>+</sup>-ATPase activity. *J. Biol. Chem.* **266**, 24526–24532.
- Umemoto, N., Yoshihisa, T., Hirata, R. and Anraku, Y.** (1990). Roles of the *VMA3* gene product, subunit c of the vacuolar membrane H<sup>+</sup>-ATPase on vacuolar acidification and protein transport. *J. Biol. Chem.* **265**, 18447–18453.
